# Supplementary material for: Plant Growth Promotion and Stress Tolerance Enhancement through Inoculation with Bacillus proteolyticus OSUB18
Source: MDPI journal article supplement (doi:10.3390/biology12121495), 2023-12-06
Supplement: s1 [file s1]

**Table S1** Phytopathogenic microbes used in this study.

| Microbe  | Microbial Species           | Plant Disease                    | Reference |
|----------|-----------------------------|----------------------------------|-----------|
| Bacteria | <i>Pseudomonas syringae</i> | Bacterial speck                  | [32]      |
| Fungi    | <i>Botrytis cinerea</i>     | Gray mold disease                | [4]       |
| Fungi    | <i>Fusarium graminearum</i> | Fusarium head blight disease     | [43]      |
| Fungi    | <i>Fusarium oxysporum</i>   | Fusarium wilt disease            | [44]      |
| Fungi    | <i>Magnaporthe oryzae</i>   | Rice blast disease               | [45]      |
| Oomycete | <i>Phytophthora capsici</i> | Blight and fruit rot disease     | [46]      |
| Oomycete | <i>Pythium ultimum</i>      | Damping off and root rot disease | [46]      |
