# Supplementary material for: Plant Growth Promotion and Stress Tolerance Enhancement through Inoculation with Bacillus proteolyticus OSUB18
Source: MDPI journal article supplement (doi:10.3390/biology12121495), 2023-12-06
Supplement: s1 [file s1]

Table S1 Phytopathogenic microbes used in this study.

Table S2 Transcript levels of genes induced ( $\log_2$  fold change  $> 1$ , p-value adjusted  $< 0.05$ ) in Arabidopsis plants inoculated with OSUB18 compared to water control. An Excel file was submitted separately. The  $\log_2$  fold change values were labeled with gradient colors in the excel sheet.

Table S3 Transcript levels of genes repressed ( $\log_2$  fold change  $> 1$ , p-value adjusted  $< 0.05$ ) in Arabidopsis plants inoculated with OSUB18 compared to water control. An Excel file was submitted separately. The  $\log_2$  fold change values were labeled with gradient colors in the excel sheet.
