# Supplementary material for: Plant Growth Promotion and Stress Tolerance Enhancement through Inoculation with Bacillus proteolyticus OSUB18
Source: Biology (Basel). 2023 Dec 6;12(12):1495. doi: 10.3390/biology12121495 (PMC10740446; doi:10.3390/biology12121495)
Supplement: Supplementary file 1 [file biology-12-01495-s001.zip]

Archive with 4 entries (4 files):
- Supplemental Table S1.pdf
- Supplemental Table S2.xlsx
- Supplemental Table S3.xlsx
- Supplementary caption.pdf
