# Supplementary material for: Plant Growth Promotion and Stress Tolerance Enhancement through Inoculation with Bacillus proteolyticus OSUB18
Source: Biology (Basel). 2023 Dec 6;12(12):1495. doi: 10.3390/biology12121495 (PMC10740446; doi:10.3390/biology12121495)
Supplement: Supplementary file 1 [file biology-12-01495-s001.zip › Supplemental Table S2.xlsx]

## Sheet: Supplemental Table 2 
Supplemental Table S2. Transcript levels of genes induced (log2 fold change > 1, p-value adjusted < 0.05) in Arabidopsis plants drenched with OSUB18 compared to water control. The Log2 fold change values were labeled with gradient colors in the excel sheet.
Gene ID	Log2 fold change	p-value	p-value adjusted	Gene Symbol	Gene Description
AT2G26020	21.8268	6.3927e-13	2.37595e-09	PDF1.2b	Predicted to encode a PR (pathogenesis-related) protein.
AT2G26010	10.1812	0.00158737	0.0485573	PDF1.3	Predicted to encode a PR (pathogenesis-related) protein.
AT5G44420	9.82581	9.53417e-05	0.00718284	PDF1.2	Encodes an ethylene- and jasmonate-responsive plant defensin.
AT5G35932	5.51644	0.000999962	0.0355648	NA*	Pseudogene of hypothetical protein.
AT4G07850	4.17811	2.61751e-05	0.00272759	NA	Transposable_element_gene.
AT1G13609	4.17248	1.83934e-05	0.00213792	NA	Encodes a defensin-like (DEFL) family protein.
AT1G08090	3.877	0.000326941	0.0171953	NRT2:1	High-affinity nitrate transporter. Up-regulated by nitrate.
AT1G16400	3.36234	6.53425e-05	0.00529868	CYP79F2	Encodes cytochrome P450 CYP79F2.
AT1G09865	3.34385	0.00021036	0.012443	NA	Novel transcribed region
AT3G30720	2.98603	0.000606218	0.0255551	QQS	QQS is an orphan gene that arose recently in the Arabidopsis thaliana lineage.
AT2G38300	2.81205	0.000593485	0.0252571	NA	Myb-like HTH transcriptional regulator family protein.
AT5G07200	2.76334	0.000806675	0.0310658	GA20OX3	Encodes a gibberellin 20-oxidase.
AT5G65080	2.36972	0.00106799	0.0371485	MAF5	Is upregulated during vernalization and regulates flowering time.
AT3G02015	2.31987	0.0011256	0.0384981	NA	Natural antisense transcript overlaps with AT3G07568.
AT3G58990	2.30739	4.09081e-05	0.00378527	IPMI1	Together with IPMI SSU3 participates in the Met chain elongation pathway.
AT1G52800	2.14184	9.12732e-07	0.000221355	NA	2-oxoglutarate (2OG) and Fe(II)-dependent oxygenase superfamily protein.
AT4G34800	2.13081	1.6049e-06	0.000340849	SAUR4	SAUR-like auxin-responsive protein family.
AT1G76240	2.12676	0.000811358	0.0311416	NA	DUF241 domain protein (DUF241).
AT4G14640	2.05767	1.85173e-05	0.00213792	CAM8	Encodes a divergent member of calmodulin, which is a Ca2+-binding proteins.
AT1G57590	1.99749	1.1727e-08	5.68506e-06	PAE2	Pectinacetylesterase family protein.
AT5G59990	1.96056	3.63529e-05	0.00344702	NA	CCT motif family protein.
AT2G46660	1.93369	0.00100383	0.0356456	CYP78A6	Encodes a member of CYP78A cytochrome P450 monooxygenase protein family.
AT1G64780	1.91193	6.8255e-08	2.81868e-05	AMT1;2	Encodes an ammonium transporter protein believed to act as a high affinity transporter.
AT1G66960	1.85135	2.90009e-06	0.000514994	LUP5	Terpenoid cyclases family protein.
AT1G49470	1.83346	9.98739e-18	7.99603e-14	NA	Transmembrane epididymal protein (DUF716).
AT3G19710	1.7744	0.000868187	0.0326269	BCAT4	Encodes a methionine-oxo-acid transaminase.
AT4G17460	1.65317	1.95372e-05	0.0022004	HAT1	Encodes a class II HD-ZIP protein that regulates meristematic activity in different tissues.
AT2G16580	1.60803	0.000291951	0.0158439	SAUR8	SAUR-like auxin-responsive protein family.
AT5G03552	1.52415	0.000612657	0.0257293	MIR822A	Encodes a microRNA of unknown function.
AT4G04745	1.51811	0.00120258	0.0399666	NA	Hypothetical protein.
AT2G31250	1.50237	0.000865226	0.0326269	HEMA3	Glutamyl-tRNA reductase family protein.
AT1G53700	1.49231	0.000184632	0.0113424	WAG1	Encodes a protein-serine/threonine kinase that are nearly 70% identical to PsPK3 protein.
AT1G20696	1.43271	4.82547e-05	0.00428717	HMGB3	The HMGB proteins are involved in the assembly of nucleoprotein complexes.
AT5G09590	1.40648	0.000256607	0.0144139	MTHSC70-2	Heat shock protein 70 (Hsc70-5).
AT5G07780	1.40422	0.000141107	0.00933044	FH19	Encodes a class II formin that nucleates actin assembly.
AT1G06547	1.39527	0.000659488	0.0270247	NA	NA
AT3G48260	1.3723	0.00162486	0.0491647	WNK3	Encodes a member of the WNK family (9 members in all) of protein kinases.
AT1G61930	1.3644	4.90169e-07	0.000134948	S40-6	Senescence regulator.
AT4G14750	1.36242	0.000271674	0.0151081	IQD19	Member of IQ67 (CaM binding) domain containing family.
AT5G51310	1.33255	1.03027e-05	0.00138404	NA	Mutants exhibit longer root hairs under phosphate-deficient conditions.
AT5G49100	1.32877	2.40939e-07	7.46242e-05	NA	Vitellogenin-like protein.
AT5G20110	1.3165	4.15325e-05	0.00381142	NA	Dynein light chain type 1 family protein.
AT2G21650	1.30069	0.000192637	0.0117372	MEE3	A member of a small sub-family of single MYB transcription factors.
AT5G45720	1.29838	0.00157577	0.0483542	NA	AAA-type ATPase family protein.
AT2G38180	1.28872	1.57525e-05	0.00191957	NA	SGNH hydrolase-type esterase superfamily protein.
AT1G24800	1.27749	7.6003e-08	3.01967e-05	NA	F-box family protein.
AT1G51440	1.26176	3.18627e-05	0.00314397	DALL2	Encodes a lipase that hydrolyzes phosphatidylcholine, glycolipids as well as triacylglycerols.
AT5G66590	1.25981	1.91583e-05	0.00217578	CAP	Cysteine-rich secretory proteins.
AT1G67590	1.23297	1.56264e-09	1.15297e-06	NA	Remorin family protein.
AT1G72240	1.22646	0.000251052	0.0141441	NA	Hypothetical protein.
AT3G05690	1.21769	2.29087e-06	0.000430241	NF-YA2	Encodes a subunit of CCAAT-binding complex.
AT3G54960	1.2139	0.000969789	0.0348249	PDIL1-3	Encodes a protein disulfide isomerase-like (PDIL) protein.
AT4G32890	1.20216	1.0757e-17	7.99603e-14	GATA9	Encodes a member of the GATA factor family of zinc finger transcription factors.
AT4G39800	1.19854	3.50647e-06	0.000606157	MIPS1	NA
AT1G74090	1.19173	4.1745e-07	0.000122489	SOT18	Encodes a desulfoglucosinolate sulfotransferase.
AT1G62870	1.17492	7.02564e-08	2.84858e-05	NA	Hypothetical protein.
AT3G61898	1.16513	8.18532e-05	0.00636002	NA	Transmembrane protein.
AT1G56020	1.16118	2.24525e-07	7.25638e-05	NA	Serine/arginine repetitive matrix-like protein.
AT1G77660	1.10294	1.1068e-08	5.56952e-06	NA	Phosphatidylinositol 4-phosphate 5-kinase (PIP5K) enzyme family member.
AT3G20470	1.09807	0.00144502	0.0457079	GRP5	Encodes a glycine-rich protein that is expressed more abundantly in immature seed pods.
AT5G65090	1.07636	0.000476495	0.021819	BST1	Encodes a protein involved in root hair morphogenesis and tip growth.
AT5G02050	1.07621	1.85989e-05	0.00213792	NA	Mitochondrial glycoprotein family protein.
AT5G66350	1.07248	1.57229e-05	0.00191957	SHI	A member of SHI gene family.
AT2G22840	1.05314	0.00117637	0.0397099	GRF1	Growth regulating factor encoding transcription activator.
AT3G15115	1.05108	0.000345936	0.0178573	NA	Serine/arginine repetitive matrix protein.
AT1G80270	1.04033	2.91941e-05	0.00294583	PPR596	Pentatricopeptide repeat 596.
AT2G20710	1.03552	0.000416893	0.0199073	NA	Tetratricopeptide repeat (TPR)-like superfamily protein.
AT5G50200	1.01606	0.000458386	0.0212618	WR3	Encodes a high-affinity nitrate transporter. Up-regulated by nitrate.
AT5G15980	1.00885	4.21162e-05	0.00384914	RPPR8	Ribosomal pentatricopeptide repeat protein.
NA*, not applicable.
