# Supplementary material for: Plant Growth Promotion and Stress Tolerance Enhancement through Inoculation with Bacillus proteolyticus OSUB18
Source: Biology (Basel). 2023 Dec 6;12(12):1495. doi: 10.3390/biology12121495 (PMC10740446; doi:10.3390/biology12121495)
Supplement: Supplementary file 1 [file biology-12-01495-s001.zip › Supplemental Table S3.xlsx]

## Sheet: Supplemental Table 3
Supplemental Table S3. Transcript levels of genes repressed (log2 fold change > 1, p-value adjusted < 0.05) in Arabidopsis plants drenched with OSUB18 compared to water control. The Log2 fold change values were labeled with gradient colors in the excel sheet.
Gene ID	Log2 fold change	p-value	p-value adjusted	Gene Symbol	Gene Description
AT2G01422	-10.4893	1.9057e-63	4.24972e-59	NA*	NA
AT4G31940	-8.63409	0.00165848	0.0497766	CYP82C4	The gene encodes a cytochrome P450 enzyme, CYP82C.
AT1G73120	-7.60429	0.00117705	0.0397099	NA	F-box/RNI superfamily protein.
AT3G05600	-6.2482	0.000123971	0.00858556	ATEH1	Encodes a cytosolic epoxide hydrolase capable of acting on 9,10-epoxystearic acid.
AT5G42800	-6.23044	5.95504e-06	0.000897826	DFR	Catalyzes the conversion of dihydroquercetin to leucocyanidin in the biosynthesis of anthocyanins.
AT5G00490	-5.89003	5.98333e-08	2.51751e-05	NA	Novel transcribed region.
AT4G09820	-5.79191	7.71844e-08	3.01967e-05	TT8	TT8 is a regulation factor that acts on the regulation of flavonoid pathways.
AT5G02155	-5.55431	0.000538526	0.0238277	NA	Natural antisense transcript overlaps with AT5G14120.
AT4G22880	-5.1387	9.90519e-08	3.6938e-05	LDOX	Encodes leucoanthocyanidin dioxygenase, which is involved in proanthocyanin biosynthesis.
AT3G60170	-5.10488	1.2968e-05	0.00166199	NA	Transposable_element_gene.
AT5G44973	-5.06023	0.000297655	0.0160719	NA	Encodes a defensin-like (DEFL) family protein.
AT1G32780	-4.81597	0.000108358	0.00787049	NA	GroES-like zinc-binding dehydrogenase family protein.
AT5G48490	-4.36512	0.000113857	0.00808604	DIR1-LIKE	Encodes a protein with similarity to a lipid transfer protein.
AT3G19270	-4.15035	4.8646e-05	0.00430478	CYP707A4	Encodes a protein with ABA 8'-hydroxylase activity, involved in ABA catabolism.
AT5G17220	-4.04073	2.41444e-05	0.00258856	GSTF12	Encodes glutathione transferase belonging to the phi class of GSTs.
AT2G46375	-3.9515	0.000939824	0.0340782	NA	Hypothetical protein.
AT5G54060	-3.92152	3.77585e-05	0.00353787	UF3GT	Encodes a anthocyanin 3-O-glucoside: 2"-O-xylosyl-transferase involved in anthocyanin modification.
AT3G49230	-3.92017	0.000636236	0.0264703	DEG1	Transmembrane protein.
AT3G29590	-3.9127	0.000957694	0.0346136	AT5MAT	Encodes a malonyl-CoA:anthocyanidin 5-O-glucoside-6"-O-malonyltransferase.
AT1G15520	-3.60781	5.39666e-06	0.000847504	ABCG40	ABC transporter family involved in ABA transport and resistance to lead.
AT3G19002	-3.59661	0.00165041	0.0496013	NA	Natural antisense transcript overlaps with AT3G19000.
AT1G62420	-3.53631	0.000176353	0.0108637	NA	DUF506 family protein (DUF506).
AT4G31805	-3.46978	6.10859e-05	0.0050108	POLAR	Encodes POLAR, a scaffold protein associated with cellular asymmetry of meristemoids.
AT3G49570	-3.37002	0.00068585	0.0275576	LSU3	Response to low sulfur 3.
AT5G16960	-3.33071	2.2959e-06	0.000430241	NA	Zinc-binding dehydrogenase family protein.
AT5G07990	-3.31087	1.60114e-05	0.00194051	TT7	Required for flavonoid 3' hydroxylase activity.
AT3G55710	-3.23701	0.00155713	0.0482276	NA	UDP-Glycosyltransferase superfamily protein.
AT1G59265	-3.20128	0.00133789	0.0436183	NA	Transposable_element_gene.
AT4G06746	-3.19209	8.58825e-05	0.00664993	RAP2.9	Encodes a member of the DREB subfamily A-5 of ERF/AP2 transcription factor family.
AT1G35200	-3.16603	0.000367501	0.0185413	NA	Pseudogene of Ribosomal protein L4/L1 family.
AT2G39690	-3.14451	0.00150024	0.0468803	NA	Ternary complex factor MIP1 leucine-zipper protein.
AT5G23350	-3.11064	0.000935164	0.0340198	NA	GRAM domain protein/ABA-responsive-like protein
AT3G27970	-3.05083	0.000580308	0.0248385	NA	Exonuclease family protein.
AT5G60780	-2.99723	0.000713251	0.0284535	NRT2.3	Member of High affinity nitrate transporter family.
AT2G38240	-2.90806	0.00109328	0.0377402	JOX4	One of 4 paralogs encoding a 2-oxoglutarate/Fe(II)-dependent oxygenases that hydroxylates JA to 12-OH-JA.
AT2G41990	-2.85759	0.000398194	0.0193038	CC3	Late embryogenesis abundant protein.
AT1G58889	-2.76467	0.000369789	0.0185867	NA	Transposable_element_gene.
AT3G14760	-2.72442	0.000353511	0.018081	NA	Transmembrane protein.
AT2G07751	-2.5909	0.000272905	0.0151388	NA	NADH:ubiquinone/plastoquinone oxidoreductase, chain 3 protein.
AT1G45191	-2.51717	2.04879e-07	6.71884e-05	BGLU1	Beta-glucosidase related protein.
AT4G08040	-2.47429	0.000847849	0.032375	ACS11	Encodes an aminotransferase that belongs to ACC synthase gene family structurally.
AT4G22620	-2.45483	0.00072402	0.0287801	SAUR34	SAUR-like auxin-responsive protein family.
AT5G05270	-2.43128	0.00090497	0.033412	CHIL	Chalcone-flavanone isomerase family protein.
AT1G20390	-2.42197	3.37645e-05	0.00328799	NA	Transposable_element_gene.
AT2G23000	-2.41512	2.87224e-06	0.000514994	SCPL10	Serine carboxypeptidase-like 10.
AT1G21120	-2.41103	0.0015527	0.0481574	IGMT2	O-methyltransferase family protein.
AT4G24960	-2.39735	0.000906694	0.0334203	HVA22D	Homologous to a eukaryote specific ABA- and stress-inducible gene first isolated from barley.
AT4G03510	-2.387	0.00026909	0.0150394	RMA1	Has E3 ubiquitin ligase activity.
AT3G63380	-2.38497	6.75451e-05	0.00536034	ACA12	ATPase E1-E2 type family protein / haloacid dehalogenase-like hydrolase family protein.
AT1G65390	-2.38374	0.000392882	0.0191713	PP2-A5	Encods a two-domain protein containing predicted lectin and Toll/Interleukin-1 receptor domains.
AT1G80080	-2.33019	0.00134303	0.0436583	TMM	Encodes a transmembrane leucine-repeat containing receptor-like protein.
AT5G23360	-2.30057	0.000103006	0.00755604	NA	GRAM domain-containing protein / ABA-responsive protein-like protein.
AT3G29644	-2.29497	3.79637e-11	7.05491e-08	SORF29	Natural antisense transcript overlaps with AT3G29642.
AT2G17830	-2.23339	0.000157439	0.0100888	NA	F-box and associated interaction domains-containing protein.
AT2G18700	-2.22189	0.000270099	0.015058	TPS11	Encodes an enzyme putatively involved in trehalose biosynthesis.
AT1G05675	-2.15565	9.44708e-07	0.000224117	NA	UDP-Glycosyltransferase superfamily protein.
AT3G09520	-2.14564	0.000300772	0.016201	EXO70H4	A member of EXO70 gene family, putative exocyst subunits, conserved in land plants.
AT5G11410	-2.13057	0.00103642	0.0363971	SZE2	Similar to receptor like kinase but does not appear to have kinase activity (psuedokinase).
AT5G66150	-2.09406	1.47959e-07	5.15546e-05	NA	Glycosyl hydrolase family 38 protein.
AT4G08925	-2.08338	0.000537147	0.0238277	NA	Natural antisense transcript overlaps with AT4G34120.
AT3G15356	-2.08269	0.000196858	0.0119239	NA	Legume lectin family protein.
AT5G23270	-2.05332	6.11183e-05	0.0050108	STP11	Membrane localized sucrose transporter.
AT3G08860	-2.04172	0.00147002	0.0463013	PYD4	Encodes a protein that is predicted to have beta-alanine aminotransferase activity.
AT5G56960	-2.04	0.00102326	0.0361054	NA	Basic helix-loop-helix (bHLH) DNA-binding family protein.
AT3G61060	-2.02703	5.28513e-05	0.00449841	PP2-A13	Phloem protein 2-A13.
AT5G57220	-2.01175	0.000156373	0.0100663	CYP81F2	Member of CYP81F, involved in glucosinolate metabolism.
AT1G78410	-1.97632	4.21088e-06	0.000685421	NA	VQ motif-containing protein.
AT3G49580	-1.94243	0.000914674	0.0336032	LSU1	Response to low sulfur 1.
AT5G54170	-1.93195	3.99108e-05	0.00371075	NA	Polyketide cyclase/dehydrase and lipid transport superfamily protein.
AT3G48460	-1.93083	0.00146303	0.0461463	SFAR4	GDSL-motif esterase/acyltransferase/lipase.
AT1G65060	-1.92076	3.12089e-05	0.00310696	4CL3	Encodes an isoform of 4-coumarate:CoA ligase (4CL).
AT2G39660	-1.91057	5.54631e-06	0.000864914	BIK1	Encodes a plasma membrane-localized ser/thr protein kinase.
AT2G38210	-1.90614	6.02534e-05	0.00499498	PDX1L4	Putative PDX1-like protein 4.
AT3G55120	-1.89774	0.00120077	0.039966	TT5	Catalyzes the conversion of chalcones into flavanones.
AT5G00430	-1.88653	0.00140434	0.0448664	NA	Novel transcribed region.
AT3G14050	-1.83114	0.000173421	0.0107425	RSH2	Involved in the maintenance of the (p)ppGp level to accustom plastidial gene expression to darkness.
AT1G16130	-1.81762	0.00113329	0.0387018	WAKL2	Encodes a WAK-like receptor-like kinase with a cytoplasmic Ser/Thr protein kinase domain.
AT2G22800	-1.81491	0.000963037	0.0346668	HAT9	Encodes homeobox protein HAT9.
AT1G74545	-1.8143	0.000527525	0.0235276	NA	Potential natural antisense gene, locus overlaps with AT1G74540
AT3G43850	-1.81086	0.000726958	0.0288455	NA	Hypothetical protein.
AT4G28140	-1.77664	0.00151634	0.0472268	ERF54	Encodes a member of the DREB subfamily A-6 of ERF/AP2 transcription factor family.
AT4G15210	-1.76537	0.00119858	0.0399549	BAM5	Cytosolic beta-amylase expressed in rosette leaves and inducible by sugar.
AT5G08135	-1.73984	0.000789599	0.0306227	NA	Natural antisense transcript overlaps with AT5G54170.
AT3G13276	-1.72222	0.000379288	0.0188377	NA	Hypothetical protein.
AT5G26220	-1.72135	8.92042e-06	0.00122602	GGCT2;1	ChaC-like family protein.
AT1G15430	-1.70776	0.000203898	0.0122559	NA	Hypothetical protein (DUF1644).
AT4G36105	-1.69032	0.000113763	0.00808604	NA	Polyamine-modulated factor 1-binding protein.
AT5G03720	-1.68368	0.000565968	0.0245465	HSFA3	Member of Heat Stress Transcription Factor (Hsf) family.
AT4G08555	-1.66601	1.99032e-05	0.00223036	NA	Hypothetical protein.
AT5G46710	-1.66425	1.79405e-06	0.000373901	NA	PLATZ transcription factor family protein.
AT3G04060	-1.64758	0.000401929	0.0193586	NAC046	A member of the NAC domain containing family of transcription factors.
AT1G07150	-1.6084	2.42735e-05	0.00258995	MAPKKK13	Member of MEKK subfamily. Involved in wound induced signaling.
AT4G27410	-1.60265	0.00105237	0.0368992	RD26	Encodes a NAC transcription factor induced in response to desiccation.
AT3G05400	-1.60125	2.80389e-05	0.0028682	NA	Major facilitator superfamily protein.
AT3G57210	-1.59499	0.000580222	0.0248385	NA	Hypothetical protein.
AT1G18460	-1.58201	2.06966e-05	0.00227357	HYD	Alpha/beta hydrolase.
AT1G53920	-1.57607	4.44406e-06	0.000718134	GLIP5	Contains lipase signature motif and GDSL domain.
AT1G08915	-1.57481	1.48763e-05	0.00186372	NA	Novel transcribed region.
AT3G03990	-1.57256	0.0011695	0.0396457	D14	Encodes an alpha/beta hydrolase essential for strigolactone signaling.
AT4G26415	-1.5698	4.13273e-05	0.00380826	NA	Hypothetical protein.
AT1G30040	-1.56163	9.20971e-07	0.000221355	GA2OX2	Encodes a gibberellin 2-oxidase that acts on C-19 gibberellins.
AT4G24230	-1.54184	0.000551903	0.0241322	ACBP3	Acyl-CoA-binding protein ACBP3.
AT5G06870	-1.52664	0.000151122	0.00985383	PGIP2	Encodes a polygalacturonase inhibiting protein involved in plant defense response.
AT4G15700	-1.51151	0.00029178	0.0158439	GRXS3	Encodes a member of the CC-type glutaredoxin (ROXY) family.
AT5G17700	-1.50799	2.37594e-09	1.51381e-06	NA	MATE efflux family protein.
AT3G04000	-1.50451	9.72565e-05	0.00725358	CHLADR	ChlADR is an aldehyde reductase that catalyzes the reduction of the aldehyde carbonyl groups.
AT3G62950	-1.48441	0.00107742	0.0373663	GRXC11	Encodes a member of the CC-type glutaredoxin (ROXY) family.
AT3G57760	-1.46524	0.00156284	0.0482707	ZRK6	Protein kinase superfamily protein.
AT3G53160	-1.45972	1.84768e-05	0.00213792	UGT73C7	Glycosylates p-coumaric acid and ferulic acid to modulate phenylpropanoid metabolism.
AT4G32190	-1.4459	0.00085401	0.0324368	PII1	Encodes a plastid-located coiled coil-containing protein that is required for normal starch granule initiation.
AT5G16350	-1.41314	0.000436942	0.0206053	NA	O-acyltransferase (WSD1-like) family protein.
AT2G22890	-1.40539	0.00119347	0.0399549	NA	Kua-ubiquitin conjugating enzyme hybrid localization domain-containing protein.
AT1G10060	-1.40083	7.28886e-07	0.00018754	BCAT-1	Encodes a mitochondrial branched-chain amino acid aminotransferase.
AT4G30210	-1.39372	0.000454227	0.0211833	ATR2	Encodes NADPH-cytochrome P450 reductase.
AT1G63760	-1.39005	0.00159812	0.0487524	ARI6	Pseudogene of RING/U-box superfamily protein.
AT5G26920	-1.37924	0.000380589	0.0188603	CBP60G	Encodes a calmodulin-binding protein CBP60g.
AT1G75490	-1.36701	7.8044e-05	0.00614976	NA	Encodes a member of the DREB subfamily A-2 of ERF/AP2 transcription factor family.
AT2G01008	-1.36684	0.00160564	0.0489149	NA	Maternal effect embryo arrest protein.
AT5G27760	-1.35636	0.00156948	0.0482751	ATHIGD2	Hypoxia-responsive family protein.
AT3G19250	-1.3549	0.000730858	0.0289487	NA	Transmembrane protein, putative (DUF677).
AT4G22755	-1.34702	9.61876e-05	0.00719793	SMO1-3	Encodes a member of the SMO1 family of sterol 4alpha-methyl oxidases.
AT1G14370	-1.34473	6.05966e-10	5.71142e-07	APK2A	Encodes protein kinase APK2a. Protein is N-myristoylated.
AT1G27910	-1.34312	0.00139704	0.0448493	PUB45	Encodes a protein containing a UND, a U-box, and an ARM domain.
AT3G46110	-1.32355	3.58893e-05	0.00342022	SOK4	DUF966 domain containing protein, expressed during embryogenesis.
AT1G75860	-1.31692	0.000912108	0.0335644	NA	DNA ligase.
AT1G73920	-1.3002	0.00143774	0.0455421	NA	Alpha/beta-Hydrolases superfamily protein.
AT1G76700	-1.29505	2.58383e-05	0.00270514	NA	DNAJ heat shock N-terminal domain-containing protein.
AT1G68840	-1.29135	0.000111217	0.00800048	RAV2	Rav2 is part of a complex that has been named `regulator of the (H+)-ATPase of the vacuolar.
AT4G17900	-1.28455	0.000870473	0.0326269	PLATZ11	PLATZ transcription factor family protein.
AT5G36000	-1.28371	0.000569316	0.0246042	NA	F-box protein RMF.
AT1G50460	-1.2736	0.000209753	0.0124401	HKL1	Involved in glucose-ethylene crosstalk.
AT2G32240	-1.23983	0.00164039	0.0494296	PICC	PAMP induced protein involved in defense response.
AT4G14090	-1.2378	0.0012591	0.0416587	NA	Encodes a anthocyanidin 5-O-glucosyltransferase.
AT5G20820	-1.23513	0.000197307	0.0119239	SAUR76	SAUR-like auxin-responsive protein family.
AT5G62070	-1.22911	0.000474089	0.0217535	IQD23	Member of IQ67 (CaM binding) domain containing family.
AT4G18280	-1.22424	0.00136367	0.0441101	GRPL1	Encodes a gene whose transcription is induced in response to potassium-deficiency.
AT1G69840	-1.21174	9.23168e-05	0.00700226	ATHIR1	SPFH/Band 7/PHB domain-containing membrane-associated protein family.
AT2G39570	-1.20955	0.00127836	0.0420822	ACR9	Encodes a ACT domain-containing protein.
AT4G18010	-1.20204	0.000128875	0.00881571	IP5PII	Encodes an inositol polyphosphate 5-phosphatase that appears to have Type I activity.
AT2G27500	-1.20106	0.000577394	0.024809	NA	Glycosyl hydrolase superfamily protein.
AT1G68340	-1.19633	0.00134948	0.0438042	NA	Hypothetical protein (DUF1639).
AT3G29200	-1.19085	0.000561867	0.0244243	CM1	L-ascorbate peroxidase.
AT3G55880	-1.17464	0.000672243	0.0273441	SUE4	A gain-of-function mutant of SUE4 exhibited improved low sulphur tolerance.
AT3G13430	-1.17085	0.000842152	0.0322127	BTL07	RING/U-box superfamily protein.
AT1G25560	-1.16033	8.01303e-07	0.000200776	TEM1	Encodes a member of the RAV transcription factor family that contains AP2 and B3 binding domains.
AT4G15690	-1.15861	0.00101065	0.0358306	GRXS5	Encodes a member of the CC-type glutaredoxin (ROXY) family.
AT3G45730	-1.14397	5.87426e-08	2.51751e-05	NA	Hypothetical protein.
AT1G02230	-1.13801	0.00047888	0.0218832	NAC004	NAC domain containing protein 4.
AT5G61560	-1.11513	0.000360363	0.0183054	PUB51	Plant U-box type E3 ubiquitin ligase (PUB).
AT2G30600	-1.10588	2.19476e-09	1.4395e-06	NA	BTB/POZ domain-containing protein.
AT3G14770	-1.10094	0.000133105	0.00901301	SWEET2	Nodulin MtN3 family protein.
AT1G13790	-1.09987	1.00918e-05	0.00136392	FDM4	Belongs to a subgroup of SGS3-like proteins that act redundantly in RNA-directed DNA methylation.
AT5G53750	-1.09861	1.28522e-05	0.00165668	NA	CBS domain-containing protein.
AT2G42950	-1.09408	6.72644e-05	0.00536034	NA	Magnesium transporter CorA-like family protein.
AT1G21010	-1.09167	5.03873e-06	0.000796906	NA	PADRE proteinup-regulated after infection by S. sclerotiorun.
AT4G37670	-1.08809	1.66509e-06	0.000350298	NAGS2	N-acetyl-l-glutamate synthase 2.
AT3G07565	-1.08384	1.21916e-05	0.00158065	NA	Histone H2A deubiquitinase (DUF3755).
AT4G26400	-1.08013	9.93847e-08	3.6938e-05	BTL05	RING/U-box superfamily protein.
AT4G23470	-1.07163	0.000616998	0.0258144	NA	PLAC8 family protein.
AT1G42990	-1.06221	0.000213585	0.0125672	BZIP60	BZIP60 consists of a bZIP DNA binding domain followed by a putative transmembrane domain.
AT1G30755	-1.04394	0.00038351	0.0189629	PSI2	Elongation factor G, putative (DUF668).
AT1G15530	-1.03934	0.000548835	0.0240452	LECRK-S.1	Concanavalin A-like lectin protein kinase family protein.
AT3G03020	-1.03881	0.000112956	0.00807348	NA	Hypothetical protein.
AT3G45040	-1.03775	5.75629e-05	0.00481138	DOK1	Encodes a putative dolichol kinase that is localized to the endoplasmic reticulum.
AT2G23320	-1.03442	5.60322e-06	0.000867721	WRKY15	Encodes WRKY DNA-binding protein 15.
AT1G75020	-1.03228	0.000109434	0.00789765	LPAT4	Lysophosphatidyl acyltransferase 4.
AT1G33590	-1.02065	2.49837e-09	1.5476e-06	NA	Leucine-rich repeat (LRR) family protein.
AT4G25030	-1.01737	3.91074e-09	2.23614e-06	ATNHR2B	Plastid localized protein of unknown function.
AT1G19380	-1.00795	0.000560735	0.0244226	NA	NA
AT2G33330	-1.00668	3.90246e-07	0.000116033	PDLP3	Encodes a plasmodesmal protein that affects the intercellular movement of molecules.
AT5G18400	-1.00197	0.000750761	0.0294753	DRE2	Cytosolic Iron-sulfur cluster Assembly protein.
AT2G30990	-1.00136	8.95547e-07	0.000221355	NA	Arginine N-methyltransferase.
NA*, not applicable.
